# Supplementary material for: Multiple guidance mechanisms control axon growth to generate precise T-shaped bifurcation during dorsal funiculus development in the spinal cord
Source: eLife. 2024 Aug 19;13:RP94109. doi: 10.7554/eLife.94109 (PMC11333043; doi:10.7554/eLife.94109)
Supplement: Figure 1—source data 1. [file elife-94109-fig1-data1.xlsx]

## Sheet: Sheet1
Figure 1, Panel F
	# of Misprojections
	Proximal			Medial			Distal
WT	1	0	0	1	0	0	1	0	0
Nβ/β	25	18	23	21	13	18	16	10	15
