# Supplementary material for: Multiple guidance mechanisms control axon growth to generate precise T-shaped bifurcation during dorsal funiculus development in the spinal cord
Source: eLife. 2024 Aug 19;13:RP94109. doi: 10.7554/eLife.94109 (PMC11333043; doi:10.7554/eLife.94109)
Supplement: Figure 2—source data 1. [file elife-94109-fig2-data1.xlsx]

## Sheet: Sheet1
Figure 2, Panel I
	% of defects
	Non-Bifurcated (-)			Bifurcated (+)
WT	0	0	0	8.33333	0	0
Nβ/β	75	66.6667	66.6667	37.6	75	50
