# Supplementary material for: Multiple guidance mechanisms control axon growth to generate precise T-shaped bifurcation during dorsal funiculus development in the spinal cord
Source: eLife. 2024 Aug 19;13:RP94109. doi: 10.7554/eLife.94109 (PMC11333043; doi:10.7554/eLife.94109)
Supplement: Figure 3—source data 1. [file elife-94109-fig3-data1.xlsx]

## Sheet: Sheet1
Figure 3, Panel H
	# of misprojections from lateral view
	Proximal			Medial			Distal
S1-/-	1	2	2	1	2	0	1	1	0
S1-/-;S2-/-	16	17	10	6	8	5	3	2	0
S1-/-;Nβ/β	18	15	19	14	12	15	8	7	8
S1-/-;S2-/-;Nβ/β	28	30	37	14	35	24	20	21	19
Figure 3, Panel N
	# of misprojections from dorsal view
	Proximal			Medial			Distal
S1-/-	3	2	1	4	3	1	3	3	1
S1-/-;S2-/-	8	10	9	7	7	10	6	8	10
S1-/-;Nβ/β	15	13	12	12	9	8	15	8	7
S1-/-;S2-/-;Nβ/β	14	10	16	15	13	17	15	9	15
Figure 3, Panel T
	from transverse sections
	Distance			Length
S1-/-	73.2323	60.22	74.22	0.021331	0.013375	0.028913
S1-/-;S2-/-	18.313	33.261	27.52	1.02684	0.72682	0.77168
S1-/-;Nβ/β	3.152	5.23	10.464	0.672009	0.403205	0.336597
S1-/-;S2-/-;Nβ/β	13.266	0	0	0.880754	0.762912	1.22408
