# Supplementary material for: Multiple guidance mechanisms control axon growth to generate precise T-shaped bifurcation during dorsal funiculus development in the spinal cord
Source: eLife. 2024 Aug 19;13:RP94109. doi: 10.7554/eLife.94109 (PMC11333043; doi:10.7554/eLife.94109)
Supplement: Figure 4—source data 1. [file elife-94109-fig4-data1.xlsx]

## Sheet: Sheet1
Figure 4, Panel H
	Raw angle
WT	109.155	105.156	121.378	113.361	105.922	137.207	112.451		107.249	99.487	111.947	93.583	115.281	109.5	130.581		114.584	133.2	132.926		97.277	129.534	127.71		102.732	121.105		110.189	112.683
S1-/-;S2-/-	94.664	103.519	97.841	98.072	115.058	116.691	95.871	103.558	129.308	78.801	101.738	91.233	136.734		115.367	133.116	110.096	114.034	104.652	179.331	159.711	148.624	137.518	158.867	108.607	134.826	124.845
Nβ/β	103.951	104.071	88.028	87.209	76.214	75.878	117.973	115.681	129.44	109.523	91.204	126.647	139.754	101.082	93.556	104.199	108.742	117.528	51.138		60.396	128.635	132.798	120.774	140.167	127.203	132.93	109.492	92.445	100.173	125.672	102.147	111.073	132.989	101.193	100.196	112.656	78.529	152.55
S1-/-;S2-/-;Nβ/β	74.286	29.473	99.154	113.584	147.579	100.774	91.252	127.418	124.344	49.248	76.954	68.079	85.65	158.847	166.802		174.893	174.504	166.347	75.692	36.542	115.699	120.265	118.45	90.577	123.456	165.642	172.716	168.595	58.501	46.852
Figure 4, Panel I
	|Raw angle-Mean angle|
WT	3.145	7.144	9.078	1.061	6.378	24.907	0.151		5.051	12.813	0.353	18.717	2.981	2.8	18.281		2.284	20.9	20.626		15.023	17.234	15.41		9.568	8.805		2.111	0.383
S1-/-;S2-/-	24.236	15.381	21.059	20.828	3.842	2.209	23.029	15.342	10.408	40.099	17.162	27.667	17.834		3.533	14.216	8.804	4.866	14.248	60.431	40.811	29.724	18.618	39.967	10.293	15.926	5.945
Nβ/β	4.049	3.929	19.972	20.791	31.786	32.122	9.973	7.681	21.44	1.523	16.796	18.647	31.754	6.918	14.444	3.801	0.742	9.528	56.862		47.604	20.635	24.798	12.774	32.167	19.203	24.93	1.492	15.555	7.827	17.672	5.853	3.073	24.989	6.807	7.804	4.656	29.471	44.55
S1-/-;S2-/-;Nβ/β	36.414	81.227	11.546	2.884	36.879	9.926	19.448	16.718	13.644	61.452	33.746	42.621	25.05	48.147	56.102		64.193	63.804	55.647	35.008	74.158	4.999	9.565	7.75	20.123	12.756	54.942	62.016	57.895	52.199	63.848
Figure 4, Panel J
	|Right angle-Left angle|
WT	1.906	5.669	9.431	19.778	9.359	27.707	18.13		17.307	3.666	5.216		7.457	8.422
S1-/-;S2-/-	20.703	29.597	12.255	15.962	10.406	62.64	63.84	45.066	8.21	80.066	6.869	43.593	11.889
Nβ/β	43.555	24.564	44.77	33.565	63.953	51.325	14.957	6.189	36.995	9.35	34.468	24.5	28.681	31.907	7.637	4.003	3.914	38.999	101.412
S1-/-;S2-/-;Nβ/β	100.607	145.031	67.193	37.892	111.037	14.925	29.013	8.968	33.767	74.208	88.688	104.637	82.945	100.346	119.95
