# Supplementary material for: Multiple guidance mechanisms control axon growth to generate precise T-shaped bifurcation during dorsal funiculus development in the spinal cord
Source: eLife. 2024 Aug 19;13:RP94109. doi: 10.7554/eLife.94109 (PMC11333043; doi:10.7554/eLife.94109)
Supplement: Figure 5—source data 1. [file elife-94109-fig5-data1.xlsx]

## Sheet: Sheet1
Figure 5, Panel I
	Distance
WT	62.043	75.5057	84.3808	76.1453
R1-/-;R2-/-	5.559	35.137	29.256
Dcc-/-	2.933	5.66	20.673
R1-/-;R2-/-;Dcc-/-	14.3621	0	0
Figure 5, Panel J
	Total Length
WT	0.167673	0.213994	0.061977
R1-/-;R2-/-	1.18301	1.10483	1.23455
Dcc-/-	1.55519	1.57532	1.34487
R1-/-;R2-/-;Dcc-/-	1.49179	2.38361	2.28366
